# Supplementary material
Source: publisher site journal article supplement (http://study.sagepub.com/system/files/Auspurg_Hinz_Supplements.zip)
Supplement: Supplementary file 1 [file Auspurg_Hinz_Supplements.zip]

## README: OVERVIEW ON ACCOMPANYING MATERIAL

[Accompanying material for: Katrin Auspurg & Thomas Hinz (2015): Factorial Survey Experiments. Sage Series: Quantitative Applications in the Social Sciences No. 175. Thousand Oaks, CA: Sage]

### Readme: Overview of the Accompanying Material

On this webpage we provide accompanying material such as statistical software programs to generate vignette samples and vignette texts. This material encompasses the following documents:

**§1\_documents** contain general material:

- **§1\_earningsexample.pdf**: All examples are based on the **fairness of earnings example** as it was used in our textbook. To better comprehend the material it will be helpful to have a compact **overview** on this example (e.g. how the different dimensions and levels are coded, what combinations are defined as being implausible, etc.). This is provided in this pdf document, so we recommend you first have a look at this before using the further files. Furthermore, it could also serve as a template for drafting one's own FS project.
- **§1\_glossary.pdf**: Is the glossary of the technical terms used in the textbook.

### §3\_ to §5\_documents:

Provide additional material and illustrations for the practical steps described in the textbook. These files are named after the chapters they belong to (e.g. §3\_documents belong to Chapter 3). There is often a general overview provided (in the form of a pdf), which again you might wish to study first.

**Recent developments and research activities:** There are many dynamic ongoing research activities. In response to these, we will try to keep pace by updating our accompanying online material. We would greatly appreciate any additional information that readers can provide in this regard. Please also have a look at our personal websites for recent material or activities (including workshops related to multifactorial survey experiments).

---
