# Supplementary material
Source: publisher site journal article supplement (http://study.sagepub.com/system/files/Auspurg_Hinz_Supplements.zip)
Supplement: Supplementary file 4 [file Auspurg_Hinz_Supplements.zip]

```

1  *****
2  * Katrin Auspurg & Thomas Hinz (in cooperation with Carsten
3  * Accompanying material for: Factorial Survey Experiments.
4  * SAGE, Series: Quantitative Applications in the Social
5  * Thousand Oaks, CA: SAGE
6  *
7  * STATA-SAMPLE FILES TO GENERATE VIGNETTE TEXTS & RANDOM
8  * SAMPLES: MASTER FILE
9  *****
10
11 // # 1 General setup
12
13 version 12.1 // you may change the version
14 clear
15 discard
16 set more off
17 set rmsg on
18 capture log close
19
20 * PLEASE CHANGE THE WORKING DIRECTORY!!! (cd "working
21 * directory" )
22 cd "C:\Users\katrin.auspurg\Documents\Sage
23 * ! You need to install the user-written command fre
24 * textbook\Website\$4_material\Stata"
25
26
27 // $2 Random sample of 120 vignettes, blocked to 12 decks
28
29 do 2_random.do // Skip this if you work with a D-efficient
30 sample
31
32 // $3 Labeling, arranging random orders of decks
33
34 do 3_labeling.do
35
36 // $4 Generation of text phrases, preparing data for
37 questionnaires
38
39 do 4_texts.do
40
41 // $5 Generation of random vignette orders per respondent
42
43 do 5_sorting.do // you might skip this

```

```
44  *****
45  // Exit program
46  *****
47
48  ** Delete datasets you do not longer need
49
50  capture erase universe_1.dta
51  capture erase universe_2.dta
52  capture erase vignette_wide1.dta
53  capture erase vignettetexts
54  capture erase vignettes_expanded_long.dta
55  capture erase vignettes_expanded_wide.dta
56  capture erase vignettetexts_1.dta
57  capture erase random_sample120.dta
58  capture erase random120.dta
59
60  exit
61
```
