# Supplementary material
Source: publisher site journal article supplement (http://study.sagepub.com/system/files/Auspurg_Hinz_Supplements.zip)
Supplement: Supplementary file 6 [file Auspurg_Hinz_Supplements.zip]

## DATA PREPARATION AND DATA ANALYSES

In order to facilitate replication of the techniques explained in Chapter 5, the following material is provided (**§5\_material.zip**):

- The folder **“Preparation”** contains the datasets **§5\_population\_sample.dta** and **§5\_population\_sample\_setup.dta**, which can be used to practice the preparation steps in Section 5.1 (e.g. the merging of response data and setup data). The Stata do-file **§5\_preparation.do** shows how to merge and prepare these data when working with Stata. The respondent data are still in the Stata wide format, while the setup data are in the long format. For data analyses, the data have to be merged, which can only be done when they are in the same format. In addition, data analyses require the long format.
- In addition, we provide the resulting data: **§5\_data.dta**. These can be used to replicate the data analyses in Sections 5.2 and 5.3, as shown in the do-file **§5\_analyses.do**. These data are already stored in the Stata long format (Stata version 11).

Before running the analyses files, we recommend readers first read through the following explanations.

### 5.1 General Information on the Data

As outlined in Section 5.2.3. in the textbook, the data used to illustrate the techniques of analyses were gathered in face-to-face interviews with a population sample in the city of Konstanz (southern Germany). We provide the original data of 250 respondents. Each participant evaluated 10 vignettes regarding the fairness of earnings for fictitious vignette characters on an 11-point rating scale ( $-5 = \text{unfairly low}$  to  $+5 = \text{unfairly high}$ ).

The vignette sample was generated as a *D*-efficient sample of 24 different decks of 10 vignettes each (*D*-efficiency of 90.4), excluding illogical cases (e.g. medical doctors without a university degree; see §1\_earningsexample.pdf for more details). A Resolution IV design was used in which all of the main effects and some selected two-way interactions expected from social theories and prior studies (such as interactions between the gender and labor market characteristics of the vignette person) were orthogonalized. The decks were randomly allocated to the respondents. All of the data were collected using a paper-and-pencil interview (PAPI). After some initial questions, the FS module was employed as a self-administered module.

The fictitious employees were characterized by eight dimensions (including monthly gross earnings). The vignette variables were as follows: *vsex\_f* (1 = *female*, 0 = *male*), *age* (in years, ranging from 25 to 60 years in 5-year intervals), *degree* (*vocational training* or *university degree*, with *no training* as the reference category), *children* (0, 1, 2, or 3), *job* (10 different occupations, from *unskilled worker* to *medical doctor*), *experience\_d* (1 = *a lot of*, 0 = *only few*), and *tenure\_d* (1 = *long*, 0 = *short*). Additionally, the prestige of the ten different vignette occupations is provided as a variable (magnitude prestige scores [MPSs]).

### 5.2 Codebook

The following list contains variable names and variable labels. VIGN refer to vignette characters, RESP to the respondents, and INT to the interaction terms of vignette characters and respondents.

| Variable name        | Variable label |
|----------------------|----------------|
| <code>id_resp</code> | Respondent ID  |

|              |                                                                        |
|--------------|------------------------------------------------------------------------|
| vignr        | Vignette Order                                                         |
| vig_eval     | Vignette Evaluation (dependent variable for all regressions)           |
| id_deck      | Vignette Deck ID                                                       |
| v1           | RESP: sex                                                              |
| v2           | RESP: year of birth                                                    |
| v3           | RESP: highest educational level                                        |
| v4           | RESP: difficulty to evaluate vignettes                                 |
| v5           | RESP: current employment status                                        |
| v6           | RESP: family status                                                    |
| v7           | RESP: permanent partnership                                            |
| v8           | RESP: children (yes/no)                                                |
| sex          | VIGN: sex of vignette person                                           |
| age          | VIGN: age of vignette person (in years)                                |
| degree       | VIGN: vocational/university degree of vignette person                  |
| prestige     | VIGN: occupational prestige of vignette person's job                   |
| experience   | VIGN: occupational experience of vignette person                       |
| job          | VIGN: current job/occupation of vignette person                        |
| tenure       | VIGN: tenure with current employer of vignette person                  |
| children     | VIGN: number of children of vignette person                            |
| income       | VIGN: monthly gross income of vignette person in EUR                   |
| educ_high    | RESP: indicator of university degree (0/1)                             |
| log_income   | VIGN: logged monthly gross income of vignette person in EUR            |
| vsex_f       | VIGN: indicator of female vignette person (0/1)                        |
| degree2      | VIGN: indicator of vocational training degree of vignette person (0/1) |
| degree3      | VIGN: indicator of university degree of vignette person (0/1)          |
| experience_d | VIGN: indicator of a lot of experience of vignette person (0/1)        |

|                      |                                                             |
|----------------------|-------------------------------------------------------------|
| tenure_d             | VIGN: indicator of long tenure of vignette person<br>(0/1)  |
| vsex_fXeduc_high     | INT: RESP educ_high with VIGN female                        |
| degree2Xeduc_high    | INT: RESP educ_high with VIGN vocational<br>training degree |
| degree3Xeduc_high    | INT: RESP educ_high with VIGN university degree             |
| childrenXeduc_high   | INT: RESP educ_high with VIGN number of<br>children         |
| prestigeXeduc_high   | INT: RESP educ_high with VIGN occupational<br>prestige      |
| experienceXeduc_high | INT: RESP educ_high with VIGN experience                    |
| tenureXeduc_high     | INT: RESP educ_high with VIGN tenure                        |
| log_incomeXeduc_high | INT: RESP educ_high with VIGN log_income                    |
| mean_income          | VIG: mean income of vignette person                         |

### 5.3. Data Preparation

Readers can easily merge the data from the population sample (the first 250 cases) **and the experimental setup** of the vignettes. The data files are as follows: §5\_population\_sample.dta and §5\_population\_sample\_setup.dta (see folder “Preparation”).

The procedure is documented in the Stata do-file: §5\_preparation.do.

This program contains some additional steps for recoding and defining useful variables (such as the prestige score and the logged income of vignette characters) that will be used in the analyses.

### 5.4 Replication of Analyses in the Textbook

To **replicate the data analyses in Sections 5.2 and 5.3** readers can use the Stata do-file §5\_analyses.do. Please note that all of the variables in the regression models have already been created. After opening the data file §5\_data.dta in Stata, all regression models should run.
