# Supplementary material
Source: publisher site journal article supplement (http://study.sagepub.com/system/files/Auspurg_Hinz_Supplements.zip)
Supplement: Supplementary file 10 [file Auspurg_Hinz_Supplements.zip]

Archive with 9 entries (9 files):
- )3_material.zip
- )4_material.zip
- )5_material.zip
- 0_readme.pdf
- 1_earningsexample.pdf
- 1_glossary.pdf
- 3_D-efficient_designs.pdf
- 4_vignettetexts.pdf
- 5_data_preparation_analyses.pdf
