# Supplementary material
Source: publisher site journal article supplement (http://study.sagepub.com/system/files/Auspurg_Hinz_Supplements.zip)
Supplement: Supplementary file 12 [file Auspurg_Hinz_Supplements.zip]

```

1  *****
2  * Katrin Auspurg & Thomas Hinz (in cooperation with Carsten
3  * Accompanying material for: Factorial Survey Experiments.
4  * SAGE, Series: Quantitative Applications in the Social
5  * Thousand Oaks, CA: SAGE
6  *
7  * // §1 SETUP OF VIGNETTE UNIVERSE AND RANDOM SAMPLE OF
  VIGNETTES
8  *****
9
10
11 *****
12 // #1 GENERATION OF VIGNETTE UNIVERSE
13 *****
14
15 ** Generate variables for the single dimensions
16
17 range x1 1 2 2          // sex (2 levels)
18 range x2 1 8 8          // age (8 levels)
19 range x3 1 3 3          // degree (3 levels)
20 range x4 1 6 6          // children (6 levels)
21 range x5 1 10 10        // job (10 levels)
22 range x6 1 2 2          // experience (2 levels)
23 range x7 1 2 2          // tenure (2 levels)
24 range x8 1 10 10        // income (10 levels)
25
26 ** Now generate a rectangular dataset
27
28 fillin x1 x2 x3 x4 x5 x6 x7 x8
29 drop _fillin
30
31 ** Drop lines with missings
32
33 foreach var of varlist x1-x8 {
34 drop if `var' == .
35 }
36
37 ** Check if the number of cases is correct:
38 * 2*8*3*6*10*2*2*10 = 115200
39
40 fre x1
41
42 ** the correlations among the dimensions should be zero:
43
44 corr x1 - x8
45
46 ** and all levels should appear with the same frequency:
47
48 tab1 x1 - x8

```

```

49   fre x1 - x8                                // alternative command
50
51   // To put it in terms of experimental designs,
52   // in the vignette universe the dimensions are completely
53   // "orthogonal" (uncorrelated)
54   // and "balanced" (all levels appear with the same frequency).
55   // One can also say, the design has a maximum of statistical
56   // efficiency
57   // (maximal independent variation and variance of all
58   // dimensions).
59   // These are all desirable features of experimental designs!
60
61   save universe_1, replace
62
63   *****
64   // #2 DELETION OF IMPLAUSIBLE CASES
65   *****
66
67   ** See earnignsexample.doc for more information on
68   implausible cases
69
70   drop if x6 == 1 & x7 == 2
71   drop if x5 == 8 & x3 == 1
72   drop if x5 == 10 & x3 < 3
73   drop if x5 == 1 & x8 > 6
74   drop if (x5 == 2 | x5 == 3) & x8 > 7
75   drop if (x5 > 3 & x5 < 7) & x8 > 8
76   drop if x5 == 8 & x8 < 3
77   drop if x5 > 8 & x8 < 5
78
79   ** Save the reduced vignette universe:
80
81   save universe_2, replace
82
83   *****
84   // #3 DRAWING A RANDOM SAMPLE
85   *****
86
87   * To make the random sampling replicable, indicate a seed
88   * number for the
89   * algorithm used by Stata. Otherwise, Stata will use the
90   * computer time clock.
91
92   set seed 0813 // in this example, 0813 is defined as the
93   seed number
94   sample 120, count // draws a random sample of N = 120
95   vignettes
96
97   * Save your random vignette sample:
98
99   save random_sample120, replace

```

```

94
95 *****
96 // #4 ALLOCATION OF VIGNETTES TO DECKS
97 *****
98
99 * If you want the respondents to evaluate 10 vignettes
100 * you have to create 120/100 = 12 decks
101
102 ** To create these decks, you can proceed like this:
103 * divide the sample into 12 equal-sized fractions:
104
105 gen nr = _n // running number for all vignettes
106 xtile deck = nr, nquantiles(12) //splits the sample into 12
quantiles
107 lab var deck "vignette deck"
108 drop nr
109
110 * This procedure leads to a random allocation of vignettes,
since the vignettes
111 * were already randomly drawn from the universe and hence
112 * in a random order.
113
114 ** Generate a variable indicating the serial position of
each vignette
115 * within the deck:
116
117 bysort deck: gen vignr = _n
118 lab var vignr "position of vignette within deck"
119
120 ** Move all identifiers to the first columns of the data set:
121
122 order deck vignr, first
123
124
125 ** Check again the statistical efficiency of the vignette
sample
126 * and the single decks:
127
128 corr x1 - x8
129 fre x1 - x8
130
131 bysort deck: corr x1 - x8
132 bysort deck: fre x1 - x8
133
134 * You might also check two-way interactions:
135
136 unab vars : x1-x8
137 local nvar : word count `vars'
138 forval i = 1/`nvar' {
139     forval j = 1/`=i'-1' {
140         local x : word `i' of `vars'
141         local y : word `j' of `vars'
142         generate `y'X`x' = `y' * `x'

```

```
143     }
144 }
145 corr x1 - x7Xx8
146 drop x1Xx2 - x7Xx8
147
148 *****
149 // # 5 SAVE DATA
150 *****
151
152 save random120, replace
153
154
```
